# Supplementary material for: Technological Performance of Cricket Powder (Acheta domesticus L.) in Wheat-Based Formulations
Source: MDPI journal article supplement (doi:10.3390/insects13060546), 2022-06-14
Supplement: s1 [file s1]

**Supplementary Table S1:** Gluten aggregation, mixing, extensional, and leavening properties of wheat and with increasing replacement level of cricket powder (5%, 10%, and 20% CP).

|                                                   |                                       |                      | Wheat flour           | 5% CP                 | 10% CP                | 20% CP                |
|---------------------------------------------------|---------------------------------------|----------------------|-----------------------|-----------------------|-----------------------|-----------------------|
| GLUTEN AGGREGATION PROPERTIES<br>(GlutoPeak Test) | Peak maximum time                     | (s)                  | 186±10 <sup>d</sup>   | 131±4 <sup>c</sup>    | 99±6 <sup>b</sup>     | 71±2 <sup>a</sup>     |
|                                                   | Maximum torque                        | (GPU)                | 52.3±0.6 <sup>a</sup> | 56±0.2 <sup>b</sup>   | 57.0±1.0 <sup>b</sup> | 63.5±0.7 <sup>c</sup> |
|                                                   | Total Energy                          | (cm <sup>2</sup> )   | 3402±205 <sup>c</sup> | 2882±16 <sup>b</sup>  | 2454±106 <sup>a</sup> | 2294±31 <sup>a</sup>  |
| MIXING PROPERTIES<br>(Farinograph Test)           | Water absorption                      | (%)                  | 63.1±0.3 <sup>a</sup> | 63.5±0.1 <sup>a</sup> | 65.0±0.1 <sup>b</sup> | 69.4±0.1 <sup>c</sup> |
|                                                   | Development time                      | (min)                | 9.5±0.4 <sup>c</sup>  | 7.6±0.4 <sup>b</sup>  | 5.9±0.1 <sup>a</sup>  | 6.2±0.2 <sup>a</sup>  |
|                                                   | Stability                             | (min)                | 20.8±1.3 <sup>b</sup> | 9.1±1.5 <sup>a</sup>  | 7.2±0.6 <sup>a</sup>  | 6.3±0.2 <sup>a</sup>  |
|                                                   | Degree of softening                   | (FU)                 | 27.5±6.4 <sup>a</sup> | 59.0±7.1 <sup>b</sup> | 59.0±2.8 <sup>b</sup> | 70.0±4.2 <sup>b</sup> |
| EXTENSIONAL PROPERTIES<br>(Extensograph Test)     | Extensibility (E)_45                  | (mm)                 | 210±13 <sup>c</sup>   | 169±9 <sup>b</sup>    | 147±1 <sup>b</sup>    | 111±1 <sup>a</sup>    |
|                                                   | Resistance to extension (R)_45        | (EU)                 | 328±1 <sup>ab</sup>   | 323±16 <sup>ab</sup>  | 306±2 <sup>a</sup>    | 356±1 <sup>b</sup>    |
|                                                   | R/E ratio45                           |                      | 1.6±0.1 <sup>a</sup>  | 1.9±0.1 <sup>b</sup>  | 2.1±0.1 <sup>b</sup>  | 3.2±0.1 <sup>c</sup>  |
|                                                   | Energy_45 min                         | (cm <sup>2</sup> )   | 161±11 <sup>c</sup>   | 103±11 <sup>b</sup>   | 73±1 <sup>ab</sup>    | 58±1 <sup>a</sup>     |
|                                                   | Extensibility (E)_90                  | (mm)                 | 202±9 <sup>d</sup>    | 172±3 <sup>c</sup>    | 144±6 <sup>b</sup>    | 107±4 <sup>a</sup>    |
|                                                   | Resistance to extension (R)_90        | (EU)                 | 436±20 <sup>c</sup>   | 355±8 <sup>b</sup>    | 286±11 <sup>a</sup>   | 328±1 <sup>ab</sup>   |
|                                                   | R/E ration_90                         |                      | 2.2±0.1 <sup>a</sup>  | 2.1±0.1 <sup>a</sup>  | 2.0±0.1 <sup>a</sup>  | 3.1±0.1 <sup>b</sup>  |
|                                                   | Energy_90                             | (cm <sup>2</sup> )   | 200±9 <sup>c</sup>    | 113±1 <sup>b</sup>    | 66±1 <sup>a</sup>     | 51±1 <sup>a</sup>     |
|                                                   | Extensibility (E)_135                 | (mm)                 | 199±4 <sup>d</sup>    | 172±1 <sup>c</sup>    | 141±6 <sup>b</sup>    | 94±3 <sup>a</sup>     |
|                                                   | Resistance to extension (R)_135       | (EU)                 | 434±4 <sup>c</sup>    | 332±4 <sup>b</sup>    | 296±9 <sup>a</sup>    | 334±13 <sup>b</sup>   |
|                                                   | R/E ratio_135                         |                      | 2.2±0.1 <sup>a</sup>  | 1.9±0.1 <sup>a</sup>  | 2.1±0.1 <sup>a</sup>  | 3.5±0.1 <sup>b</sup>  |
|                                                   | Energy_135                            | (cm <sup>2</sup> )   | 202±12 <sup>c</sup>   | 108±3 <sup>b</sup>    | 67±1 <sup>a</sup>     | 46±3 <sup>a</sup>     |
| EXTENSIONAL PROPERTIES<br>(Alveograph Test)       | Tenacity (P)                          | (mmH <sub>2</sub> O) | 108±6 <sup>a</sup>    | 114±5 <sup>a</sup>    | 141±4 <sup>b</sup>    | n.d.                  |
|                                                   | Extensibility (L)                     | (mm)                 | 83±9 <sup>c</sup>     | 49±5 <sup>b</sup>     | 28±4 <sup>a</sup>     | n.d.                  |
|                                                   | P/L                                   |                      | 1.3±0.2 <sup>a</sup>  | 2.4±0.3 <sup>b</sup>  | 5±1 <sup>c</sup>      | n.d.                  |
|                                                   | Force (W)                             | (10 <sup>-4</sup> J) | 347±18 <sup>c</sup>   | 224±15 <sup>b</sup>   | 174±21 <sup>a</sup>   | n.d.                  |
| LEAVENING PROPERTIES<br>(Rheofermentograph Test)  | Maximum dough height                  | (mm)                 | 52.6±2.1 <sup>c</sup> | -                     | 40.9±1.0 <sup>b</sup> | 30.4±0.2 <sup>a</sup> |
|                                                   | Time of maximum dough development     | (min)                | 160±25 <sup>b</sup>   | -                     | 138±9 <sup>a</sup>    | 140±1 <sup>a</sup>    |
|                                                   | Dough height at 360 min               | (mm)                 | 43.6±0.6 <sup>c</sup> | -                     | 32.8±1.1 <sup>b</sup> | 27.0±0.1 <sup>a</sup> |
|                                                   | Total CO <sub>2</sub>                 | (mL)                 | 1797±22 <sup>b</sup>  | -                     | 1602±86 <sup>ab</sup> | 1298±21 <sup>a</sup>  |
|                                                   | Retained CO <sub>2</sub>              | (mL)                 | 1402±11 <sup>b</sup>  | -                     | 1315±63 <sup>a</sup>  | 1126±11 <sup>a</sup>  |
|                                                   | Released CO <sub>2</sub>              | (mL)                 | 395±11 <sup>c</sup>   | -                     | 286±23 <sup>b</sup>   | 172±8 <sup>a</sup>    |
|                                                   | CO <sub>2</sub> retention coefficient | (%)                  | 78.1±0.4 <sup>a</sup> | -                     | 82.2±0.5 <sup>b</sup> | 86.8±0.5 <sup>c</sup> |

Different letters in the same row correspond to significant differences (one-way ANOVA, Tukey test HSD, p

≤ 0.05). EU: Extensograph Units; FU: Farinograph Units; GPU: GlutoPeak Unit; n.d. not determined.
